# Supplementary material
Source: PubMed Central journal article supplement (PMC6535514)
Supplement: AAC.02577-18-s0009.pdf [file AAC.02577-18-s0009.pdf]

**SUPPLEMENTAL MATERIAL**

**Next-generation sequencing based hospital outbreak investigation yields insight into *Klebsiella aerogenes* population structure and determinants of carbapenem resistance and pathogenicity**

Adel Malek<sup>1</sup>, Kelly McGlynn<sup>1</sup>, Samantha Taffner<sup>1</sup>, Lynn Fine<sup>3</sup>, Brenda Tesini<sup>4</sup>, Jun Wang<sup>1</sup>, Heba Mostafa<sup>1</sup>, Sharon Petry<sup>1</sup>, Archibald Perkins<sup>1</sup>, Paul Graman<sup>4</sup>, Dwight Hardy<sup>1,2</sup>, and Nicole Pecora<sup>1,#</sup>

Author affiliations:

<sup>1</sup>Department of Pathology and Laboratory Medicine, University of Rochester Medical Center, New York, USA

<sup>2</sup>Department of Microbiology and Immunology, University of Rochester Medical Center, New York, USA

<sup>3</sup>Infection Prevention Program, University of Rochester Medical Center, New York

<sup>4</sup>Department of Medicine, Infectious Diseases Division, University of Rochester Medical Center, New York, USA

**#Correspondence to:**

Nicole Pecora, MD, PhD, Email: [nicole\\_pecora@urmc.rochester.edu](mailto:nicole_pecora@urmc.rochester.edu), Phone: (585) 276-4674  
University of Rochester Medical Center, 601 Elmwood Avenue,  
Rochester, NY-14642, USA

**INDEX:**

|      |                            |    |
|------|----------------------------|----|
| I.   | Supplementary methods..... | 2  |
| II.  | Supplementary figures..... | 4  |
| III. | Supplementary tables.....  | 6  |
| IV.  | References.....            | 12 |

## I. SUPP. METHODS

### Sequencing library preparation and raw data acquisition

Single colony genomic DNA extractions were performed using MagNA Pure Compact instrument (Roche Diagnostics, Indianapolis, IN); DNA quality was analyzed using QuantiFluor dsDNA system (Promega). Nextera XT kit (Illumina, San Diego, CA) was used for preparing dual-indexed WGS libraries. For QC dsDNA quality of individual samples was analyzed using the 4200 TapeStation system (Agilent). Following library cleanup, individual libraries were pooled at equimolar ratios and denatured; DNA concentration was determined using Qubit ssDNA kit (Thermo fisher Scientific). The libraries were combined with 20pM PhiX control and sequenced on Illumina Miseq™ using V3 kit and 2X300 bp paired-end protocol.

### Genomic analyses

**A) Quality control:** For each sample, the read quality scores across all bases were assessed using FastQC v0.11.5 (1) and low quality reads were trimmed using Trimmomatic v0.36 (2). Genomic coverage of the sequencing reads relative to the reference *K. aerogenes* KCTC 2190 genome (ATCC 13048<sup>T</sup>; Refseq accession number: NC\_015663.1) were determined using Bowtie 2 v2.2.9 (3). Across the study isolates, alignments showed average genomic coverage of 90.84% (minimum 89%) with an average depth of coverage: 100X (excluding regions below 12X). Quality metrics are detailed in Dataset 2.

**B) Core-genome SNP calling workflow:** A read mapping approach was used to assess SNPs in the genomes of the study CR-KA strains relative to the reference genome *K. aerogenes* KCTC 2190 genome (ATCC 13048<sup>T</sup>; Refseq accession number: NC\_015663.1). Mapping, variant calling and phylogenetic analysis were performed by locally installed CFSAN SNP Pipeline v1.0.0 (4), an analysis workflow developed by the U.S Food and Drug Administration (FDA). CFSAN pipeline employs a 2-phase variant calling workflow and the 'optimized' version of the pipeline with criteria as applied by Saltykova et al (higher stringency in allele frequency thresholds and coverage) (5) was applied. In the first phase, variants were called based on *mpileup function* of SAMTools and *mpileup2snp tool* from VarScan (minimum average base quality=20, minimum read depth of coverage at site=12, minimum allele frequency=90%). Densely clustered SNPs that could arise due to recombination were excluded (>=3 SNPs in a 50 bp window). High-confidence SNP variants meeting the criteria were composed to a list. In the 2<sup>nd</sup> phase, nucleotide sites at the listed positions were determined for all sites (minimum allele frequency threshold for SNP filtering=90%). SNPs located in mobile elements as annotated by RAST were excluded. The final nucleotide sites post filtering corresponding to the listed positions were used to build a SNP matrix. A multi FASTA file with concatenated SNP matrix entries were used for inferring phylogeny by FastTree (6), which were visualized using ITOL (7).

**C) Sequence assembly, scaffolding, annotation and analyses:** De novo genome assemblies (average N<sub>50</sub>: 344943 across all isolates) were generated by SPAdes genome Assembler v3.11.1 (8), and the assembly quality was assessed by QUAST v4.5 (9). Draft genomes were annotated with RAST (10) and Prokka (11). MLST on the *K. aerogenes* genomes was performed using a newly developed publicly available scheme (12). Alleles and genetic markers corresponding to acquired antibiotic resistance, virulence and plasmid

replicons were identified using PlasmidFinder (13), ResFinder (14), and Virulence Factor Database (15). Typing of genetic loci associated with mobilizable yersiniabactin siderophore and genotoxin colibactin systems was performed using Kleborate (16), and the loci were visualized with MacVector software (MacVector, Cary, NC). Sequence variations in chromosomal genes associated with carbapenem resistance in the study strains were assessed relative to alleles in control strains (URMC 201, URMC 223) and 'wild-type' alleles in carbapenem susceptible (17) reference genome KCTC 2190 [Genbank ID-*ampD*: 10792472 (EAE\_11350), *ampG*: 10792757 (EAE\_12735), *ampR*: 10792632 (EAE\_12115), *omp35*: 10793271 (EAE\_15245), *omp36*: 10795060 (EAE\_24205) and *ompR*: 10791222 (EAE\_05245)]. Multiple sequence alignments of gene alleles and corresponding proteins was performed using Vector NTI software (Invitrogen, Carlsbad, CA) and the alignments were manually inspected to identify substitutions that would likely impact function.

**D) Comparative genomics of publicly available global *K. aerogenes* assembled genomes with URMC CR-KA assemblies:** Using a custom shell script, publicly available *K. aerogenes* genomes available as of July 2018 in the NCBI genome database were downloaded from the NCBI FTP site. Harvest genomics suite was used to perform intraspecific core-genome alignments as described before (18); phylogenies were visualized using ITOL (7).

## II. SUPP. FIGURES

**Fig. S1. Patient A timeline following CICU admit highlighting diagnostic workup, microbiological findings and antibiotic administration prior to development of CR-KA respiratory infection.**

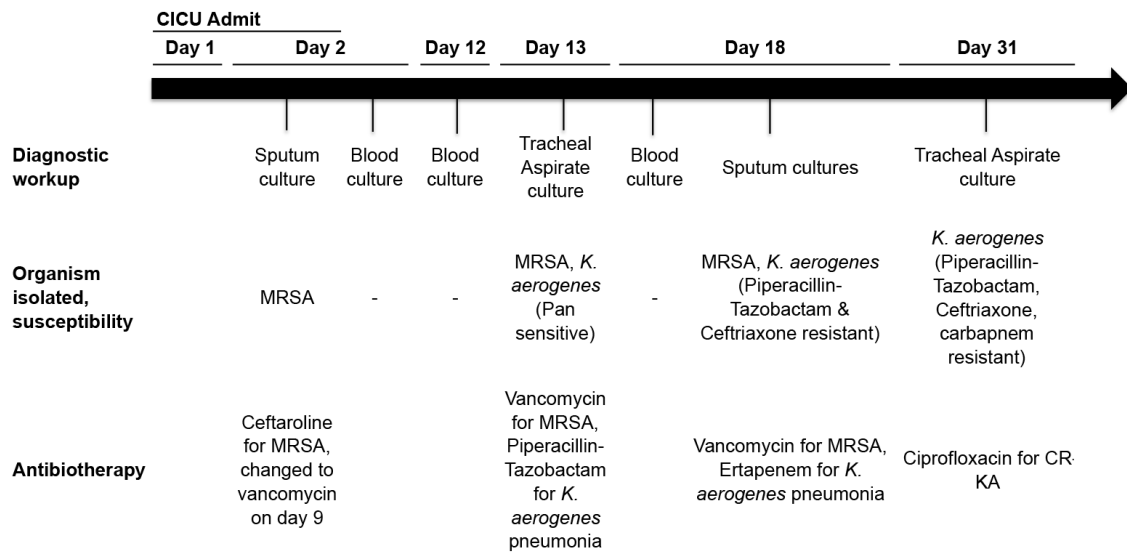

**Fig. S2. Comparison of *K. aerogenes* Omp36 with representative porins of the OmpC and OmpF families.** Predicted  $\beta$ -sheets, loops and helices are shown. Non-synonymous SNP mutations in CICU outbreak CR-KA strains resulting in substitutions relative to reference highlighted in blue.

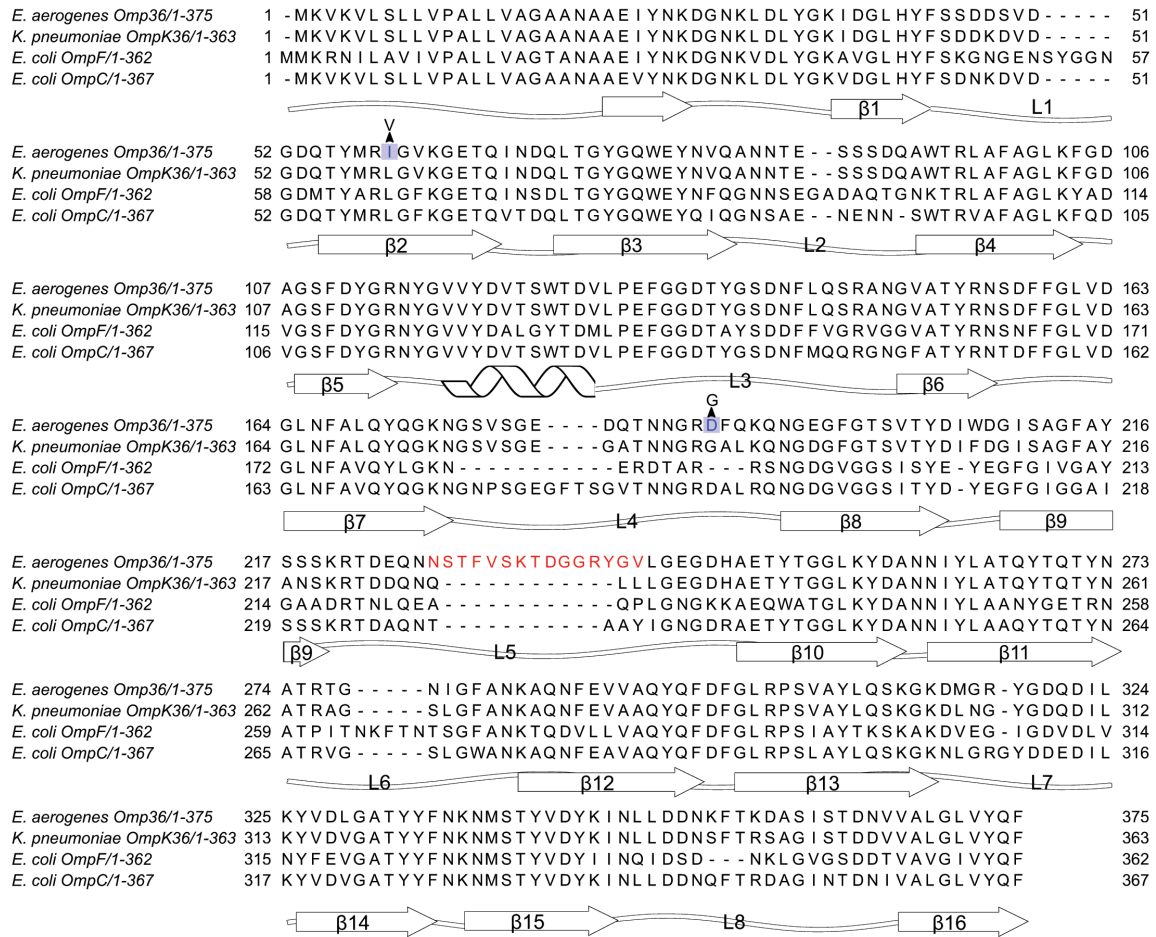

### III. SUPP. TABLES

**Table S1: Attributes of patients associated with the 2017 URMIC CICU CR- KA cluster**

| Patient ID | Isolate ID | Underlying condition/disease and indications for admission                                                     | Age range | Culture site and Type |
|------------|------------|----------------------------------------------------------------------------------------------------------------|-----------|-----------------------|
| A          | URMC 205*  | Cardiogenic shock, endocarditis, sepsis, respiratory failure, history of ECMO                                  | 20-30     | Tracheal aspirate     |
| B          | URMC 206   | Cardiac tamponade, cardiogenic shock, history of ECMO, biventricular failure, LVAD present                     | 70-80     | Sputum                |
| C          | URMC 207   | Ischemic mitral valve dysfunction, rapid atrial fibrillation, COPD, acute respiratory failure, mitral stenosis | 70-80     | Sputum                |
| D          | URMC 208   | Heart failure, LVAD present, hemorrhagic stroke and recurrent infections                                       | 60-70     | Sputum                |
| E          | URMC 209   | Congestive heart failure, elevated myocardial infraction, sarcoidosis                                          | 50-60     | Sputum                |
| F          | URMC 211   | History of fibromyalgia, cardiogenic shock, history of ECMO                                                    | 40-50     | Sputum                |
| G          | URMC 212   | Cardiac tamponade, critical aortic stenosis                                                                    | 60-70     | Rectal Surveillance   |
| H          | URMC 213   | Chronic systolic heart failure, ischemic cardiomyopathy                                                        | 60-70     | Rectal Surveillance   |
| I          | URMC 215   | Ascending aortic aneurysm repair                                                                               | 60-70     | Rectal Surveillance   |
| J          | URMC 216   | Coronary artery disease, aortic valve insufficiency                                                            | 70-80     | Rectal Surveillance   |
| K          | URMC 218   | Congestive heart failure, history of ECMO, acute heart transplant rejection                                    | 70-80     | Rectal Surveillance   |
| L          | URMC 219   | Paroxysmal atrial fibrillation, ventricular dysfunction                                                        | 60-70     | Rectal Surveillance   |
| M          | URMC 224   | Endocarditis, end-stage renal disease                                                                          | 40-50     | Blood                 |
| N          | URMC 225   | Chronic systolic heart failure, LVAD complication, cardiac tamponade                                           | 50-60     | Rectal Surveillance   |
| O          | URMC 226   | Coronary artery disease, end stage renal disease                                                               | 70-80     | Rectal Surveillance   |

\*URMC 205, first patient diagnosed with clinical CR-KA infection in the URMIC CICU in 2017

Abbr: ECMO: Extracorporeal membrane oxygenation, LVAD: left ventricular assist device present, COPD: chronic obstructive pulmonary disease

**Table S2: Univariate analysis of risk-factors associated with infection/colonization by CR-KA in the CICU**

| Characteristic                                                       | CRE cases (n=15) | Controls (n= 30) | p-value |
|----------------------------------------------------------------------|------------------|------------------|---------|
| Mean age in years                                                    | 63.6             | 55.1             | NS      |
| <b>No. (%) of patients with the following specific risk factors:</b> |                  |                  |         |
| Male                                                                 | 40               | 61               | NS      |
| Unit location                                                        | 73               | 55               | NS      |
| ECMO <sup>a</sup>                                                    | 40               | 32               | NS      |
| Transfer from another facility                                       | 53               | 42               | NS      |
| Bronchoscopy                                                         | 13               | 13               | NS      |
| Surgery History                                                      | 100              | 61               | p=.004  |
| Carbapenem exposure                                                  | 13               | 13               | NS      |
| Ventilator $\geq$ 5 days                                             | 60               | 58               | NS      |
| CRRT <sup>b</sup> /CVVH <sup>c</sup>                                 | 20               | 20               | NS      |

<sup>a</sup>ECMO: Extracorporeal membrane oxygenation

<sup>b</sup>CRRT: Continuous renal replacement therapy

<sup>c</sup>CVVH: Continuous veno-venous hemofiltration

**Table S3: Summary of additional hospital *K. aerogenes* strains in this study (isolates not associated with CICU CR-KA cluster)**

| Isolate ID | Year of positive culture | Gender | Age range | Culture site and type   | Patient's unit/ward             |
|------------|--------------------------|--------|-----------|-------------------------|---------------------------------|
| URMC 200   | 2015                     | M      | 20-30     | Catheter urine          | General Medicine                |
| URMC 201   | 2015                     | M      | 30-40     | Blood                   | Acute Care Medicine             |
| URMC 202   | 2016                     | M      | 60-70     | Bronchialveolar lavage  | Burn/Trauma                     |
| URMC 203   | 2016                     | M      | 70-80     | Biliary drain fluid     | Solid Organ Transplant          |
| URMC 204   | 2016                     | M      | 70-80     | Catheter urine          | Cardiovascular Progressive Care |
| URMC 210   | 2017                     | F      | 80-90     | Urine                   | Outpatient                      |
| URMC 214   | 2017                     | F      | 90-100    | Urine                   | Outpatient                      |
| URMC 217   | 2017                     | F      | 70-80     | Urine, cytology         | Acute Medicine                  |
| URMC 221   | 2017                     | F      | 90-100    | Urine                   | Outpatient                      |
| URMC 222   | 2017                     | F      | 40-50     | Abdominal ascites fluid | Emergency Department            |
| URMC 223*  | 2017                     | F      | 70-80     | Urine                   | Cardiovascular Step Down        |

\* All strains except URMC 223 and URMC 201 were deemed carbapenem resistant by CDC and CLSI definitions

URMC 223 was a pan-sensitive *K. aerogenes* isolated from the urine of a patient in the CICU in Oct 2017 (within the outbreak period)



**Table S4: Specific SNP substitutions in URM C ICU CR-KA strains relative to patient A strain (URMC 205)**

| Region (RAST based annotation)                                                  | Gene length | Gene location | URMC 206 | URMC 207 | URMC 208 | URMC 209 | URMC 211 | URMC 212 | URMC 213 | URMC 215 | URMC 216 | URMC 218 | URMC 219 | URMC 224 | URMC 225 | URMC 226 |
|---------------------------------------------------------------------------------|-------------|---------------|----------|----------|----------|----------|----------|----------|----------|----------|----------|----------|----------|----------|----------|----------|
| ABC transporter involved in cytochrome c biogenesis ATPase component CcmA       | 623         | 227           | -        | -        | -        | -        | -        | -        | G>T      | -        | -        | -        | -        | -        | -        | -        |
| FIG00731541: hypothetical protein                                               | 1358        | 188           | -        | -        | -        | -        | -        | -        | -        | -        | -        | -        | -        | -        | -        | C>A      |
| Glutamate-ammonia-ligase adenylyltransferase                                    | 2834        | 1750          | -        | -        | -        | -        | -        | -        | G>T      | -        | -        | -        | -        | G>T      | G>T      | G>T      |
| Glutamate-ammonia-ligase adenylyltransferase                                    | 2834        | 1751          | -        | -        | -        | -        | -        | -        | G>T      | -        | -        | -        | -        | G>T      | G>T      | G>T      |
| Phosphoenolpyruvate-dihydroxyacetone phosphotransferase regulatory protein DhaR | 1931        | 1795          | T>A      | -        | T>A      |
| Non-coding region                                                               | None        | None          | -        | -        | -        | -        | -        | -        | -        | -        | -        | -        | -        | -        | -        | T>A      |
| Non-coding region                                                               | None        | None          | A>T      | -        | -        | -        | -        | -        | -        | -        | -        | -        | -        | -        | -        | -        |
| N-acetylmuramoyl-L-alanine amidase AmpD                                         | 563         | 283           | G>T      | -        | G>T      | -        | -        | -        | -        | -        | G>T      | -        | -        | -        | -        | -        |
| N-acetylmuramoyl-L-alanine amidase AmpD                                         | 563         | 481           | A>G      | -        | A>G      | -        | -        | -        | -        | -        | A>G      | -        | -        | -        | -        | -        |
| Sugar/maltose fermentation stimulation protein homolog                          | 716         | 105           | -        | -        | -        | -        | -        | -        | -        | -        | -        | -        | -        | -        | -        | C>T      |
| Xanthine-guanine phosphoribosyltransferase                                      | 458         | 284           | -        | -        | -        | -        | -        | -        | -        | C>A      | -        | -        | C>A      | -        | -        | -        |
| Permeases of the major facilitator superfamily                                  | 1193        | 58            | -        | C>T      | -        | -        | -        | -        | -        | -        | -        | -        | -        | -        | -        | -        |
| Transcriptional regulator TetR family                                           | 566         | 461           | -        | -        | -        | C>T      | C>T      | -        | -        | C>T      | -        | C>T      | C>T      | -        | -        | -        |
| Transport ATP-binding protein CydD                                              | 1766        | 272           | -        | -        | -        | -        | C>G      | -        | -        | -        | -        | -        | -        | -        | -        | -        |
| Nitrate/nitrite transporter                                                     | 1232        | 156           | -        | -        | -        | -        | -        | -        | A>G      | -        | -        | -        | -        | -        | -        | -        |
| Tyrosyl-tRNA synthetase                                                         | 1274        | 394           | -        | -        | -        | G>T      | -        | -        | -        | -        | -        | -        | -        | -        | -        | -        |
| Malonate decarboxylase beta subunit                                             | 833         | 427           | -        | -        | -        | -        | T>G      | -        | -        | -        | -        | -        | -        | -        | -        | -        |
| Candidate type III effector Hop protein                                         | 1235        | 1065          | -        | -        | -        | C>T      | C>T      | -        | -        | C>T      | -        | C>T      | C>T      | -        | -        | -        |
| Dipeptide transport system permease protein DppC                                | 851         | 456           | -        | -        | -        | G>T      | -        | -        | -        | -        | -        | -        | -        | -        | -        | -        |
| hypothetical protein                                                            | 791         | 618           | -        | -        | -        | -        | -        | T>C      | -        | -        | -        | -        | -        | -        | -        | -        |
| FIG00644701: hypothetical protein                                               | 2036        | 1437          | -        | -        | -        | -        | -        | C>G      | -        | -        | -        | -        | -        | -        | -        | -        |
| Membrane-bound lytic murein transglycosylase E                                  | 611         | 457           | -        | -        | -        | -        | -        | -        | -        | -        | A>C      | -        | -        | -        | -        | -        |
| Outer membrane protein C precursor                                              | 305         | 122           | -        | -        | -        | T>A      | T>A      | -        | -        | T>A      | -        | T>A      | T>A      | -        | -        | -        |
| Non-coding region                                                               | None        | None          | -        | -        | -        | -        | -        | -        | -        | -        | -        | -        | -        | C>T      | -        | -        |
| <b>SNPs vs URM C 205</b>                                                        |             |               | <b>4</b> | <b>1</b> | <b>3</b> | <b>6</b> | <b>6</b> | <b>3</b> | <b>5</b> | <b>5</b> | <b>4</b> | <b>4</b> | <b>5</b> | <b>4</b> | <b>3</b> | <b>6</b> |

**Table S5: Acquired antibiotic resistance markers, plasmid replicon types and plasmid multilocus sequence typing of the study *K. aerogenes* strains**

| Study Isolates                           | Antimicrobial resistance marker    | Replicon types                                       | pMLST summary                        |
|------------------------------------------|------------------------------------|------------------------------------------------------|--------------------------------------|
| 2017 URMIC CICU associated CR-KA strains | URMC 205                           | IncFIB(pENTAS01),IncFII(Y),ColRNAI                   | IncF[Y2*:A-B-]                       |
|                                          | URMC 206                           | IncFIB(pENTAS01),IncFII(Y),ColRNAI                   | IncF[Y2*:A-B-]                       |
|                                          | URMC 207                           | IncFIB(pENTAS01),IncFII(Y),ColRNAI                   | IncF[Y2*:A-B-]                       |
|                                          | URMC 208                           | IncFIB(pENTAS01),IncFII(Y),ColRNAI                   | IncF[Y2*:A-B-]                       |
|                                          | URMC 209                           | IncFIB(pENTAS01),IncFII(Y),ColRNAI                   | IncF[Y2*:A-B-]                       |
|                                          | URMC 211                           | IncFIB(pENTAS01),IncFII(Y),ColRNAI                   | IncF[Y2*:A-B-]                       |
|                                          | URMC 212                           | IncFIB(pENTAS01),IncFII(Y),ColRNAI                   | IncF[Y2*:A-B-]                       |
|                                          | URMC 213                           | IncFIB(pENTAS01),IncFII(Y),ColRNAI                   | IncF[Y2*:A-B-]                       |
|                                          | URMC 215                           | IncFIB(pENTAS01),IncFII(Y),ColRNAI                   | IncF[Y2*:A-B-]                       |
|                                          | URMC 216                           | IncFIB(pENTAS01),IncFII(Y),ColRNAI                   | IncF[Y2*:A-B-]                       |
|                                          | URMC 218                           | IncFIB(pENTAS01),IncFII(Y),ColRNAI                   | IncF[Y2*:A-B-]                       |
|                                          | URMC 219                           | IncFIB(pENTAS01),IncFII(Y),ColRNAI                   | IncF[Y2*:A-B-]                       |
|                                          | URMC 224                           | IncFIB(pENTAS01),IncFII(Y),ColRNAI                   | IncF[Y2*:A-B-]                       |
|                                          | URMC 225                           | IncFIB(pENTAS01),IncFII(Y),ColRNAI                   | IncF[Y2*:A-B-]                       |
| URMC 226                                 | IncFIB(pENTAS01),IncFII(Y),ColRNAI | IncF[Y2*:A-B-]                                       |                                      |
| Other URMIC KA strains                   | URMC 200                           | ColRNAI                                              | NA                                   |
|                                          | URMC 201                           | No replicons found                                   | NA                                   |
|                                          | URMC 202                           | ColRNAI                                              | NA                                   |
|                                          | URMC 203                           | <i>bla</i> <sub>NMC-A</sub> IncFIB(pENTAS01),ColRNAI | IncF(unknown ST)                     |
|                                          | URMC 204                           | No replicons found                                   | NA                                   |
|                                          | URMC 210                           | IncFIB(pKPHS1),IncFIB(K),IncFII(Yp)                  | IncF[S3*:A-B-]                       |
|                                          | URMC 214                           | ColRNAI                                              | NA                                   |
|                                          | URMC 217                           | IncFIB(pENTAS01),ColRNAI                             | IncF(unknown ST)                     |
|                                          | URMC 221                           | No replicons found                                   | NA                                   |
|                                          | URMC 222                           | IncFII(SARC14),IncFII(29),IncFIB(K)                  | IncF[S3*:A-B-]                       |
|                                          | URMC 223                           | IncFIB(K),IncHI1B                                    | IncHI1(unknown ST); IncF(unknown ST) |

**Table S6:**

**Typing yersiniabactin and colibactin encoding gene clusters in URMC *K. aerogenes* strains using Kleborate**

| Study Isolates                          |                 | Yersiniabactin  | YbST    | Colibactin | CbST   |
|-----------------------------------------|-----------------|-----------------|---------|------------|--------|
| 2017 URMC CICU associated CR-KA strains | URMC 205        | ybt 17; ICEKp10 | 289-1LV | clb 3      | 17-3LV |
|                                         | URMC 206        | ybt 17; ICEKp10 | 289-1LV | clb 3      | 17-3LV |
|                                         | URMC 207        | ybt 17; ICEKp10 | 289-1LV | clb 3      | 17-3LV |
|                                         | URMC 208        | ybt 17; ICEKp10 | 289-1LV | clb 3      | 17-3LV |
|                                         | URMC 209        | ybt 17; ICEKp10 | 289-1LV | clb 3      | 17-3LV |
|                                         | URMC 211        | ybt 17; ICEKp10 | 289-1LV | clb 3      | 17-3LV |
|                                         | URMC 212        | ybt 17; ICEKp10 | 289-1LV | clb 3      | 17-3LV |
|                                         | URMC 213        | ybt 17; ICEKp10 | 289-1LV | clb 3      | 17-3LV |
|                                         | URMC 215        | ybt 17; ICEKp10 | 289-1LV | clb 3      | 17-3LV |
|                                         | URMC 216        | ybt 17; ICEKp10 | 289-1LV | clb 3      | 17-3LV |
|                                         | URMC 218        | ybt 17; ICEKp10 | 289-1LV | clb 3      | 17-3LV |
|                                         | URMC 219        | ybt 17; ICEKp10 | 289-1LV | clb 3      | 17-3LV |
|                                         | URMC 224        | ybt 17; ICEKp10 | 289-1LV | clb 3      | 17-3LV |
|                                         | URMC 225        | ybt 17; ICEKp10 | 289-1LV | clb 3      | 17-3LV |
| URMC 226                                | ybt 17; ICEKp10 | 289-1LV         | clb 3   | 17-3LV     |        |
| Other URMC KA strains                   | URMC 200        | ybt 0; ICEKp10  | 220-2LV | clb 3      | 13-2LV |
|                                         | URMC 201        | ybt 17; ICEKp10 | 289-1LV | clb 3      | 17-1LV |
|                                         | URMC 202        | ybt 17; ICEKp10 | 267     | clb 3      | 19-1LV |
|                                         | URMC 203        | -               | 0       | -          | 0      |
|                                         | URMC 204        | ybt 16; ICEKp12 | 277-3LV | clb 3      | 17-1LV |
|                                         | URMC 210        | -               | 0       | -          | 0      |
|                                         | URMC 214        | -               | 0       | -          | 0      |
|                                         | URMC 217        | -               | 0       | -          | 0      |
|                                         | URMC 221        | -               | 0       | -          | 0      |
|                                         | URMC 222        | -               | 0       | -          | 0      |
|                                         | URMC 223        | ybt 4; plasmid  | 221-3LV | -          | 0      |

Abbr: YbST: Yersiniabactin locus sequence type, CbST: Colibactin locus sequence type

## IV. REFERENCES

1. **Andrews S.** Babraham Institute Bioinformatics. FastQC. 2010, <http://www.bioinformatics.babraham.ac.uk/projects/fastqc/>.
2. **Bolger AM, Lohse M, Usadel B.** 2014. Trimmomatic: a flexible trimmer for Illumina sequence data. *Bioinformatics* **30**:2114-2120.
3. **Langmead B, Salzberg SL.** 2012. Fast gapped-read alignment with Bowtie 2. *Nat Methods* **9**:357-359.
4. **Davis S, Pettengill JB, Luo Y, Payne J, Shpuntoff A, Rand H, Strain E.** 2015. CFSAN SNP Pipeline: an automated method for constructing SNP matrices from next-generation sequence data. *PeerJ Computer Science* **1**:e20.
5. **Saltykova A, Wuyts V, Matheus W, Bertrand S, Roosens NHC, Marchal K, De Keersmaecker SCJ.** 2018. Comparison of SNP-based subtyping workflows for bacterial isolates using WGS data, applied to *Salmonella enterica* serotype Typhimurium and serotype 1,4,[5],12:i. *PLOS One* **13**:e0192504.
6. **Price MN, Dehal PS, Arkin AP.** 2010. FastTree 2-approximately maximum-likelihood trees for large alignments. *PLOS One* **5**:e9490.
7. **Letunic I, Bork P.** 2016. Interactive tree of life (iTOL) v3: an online tool for the display and annotation of phylogenetic and other trees. *Nucleic Acids Res* **44**:W242-245.
8. **Bankevich A, Nurk S, Antipov D, Gurevich AA, Dvorkin M, Kulikov AS, Lesin VM, Nikolenko SI, Pham S, Prjibelski AD, Pyshkin AV, Sirotkin AV, Vyahhi N, Tesler G, Alekseyev MA, Pevzner PA.** 2012. SPAdes: a new genome assembly algorithm and its applications to single-cell sequencing. *J Comput Biol* **19**:455-477.
9. **Gurevich A, Saveliev V, Vyahhi N, Tesler G.** 2013. QUAST: quality assessment tool for genome assemblies. *Bioinformatics* **29**:1072-1075.
10. **Aziz RK, Bartels D, Best AA, DeJongh M, Disz T, Edwards RA, Formsma K, Gerdes S, Glass EM, Kubal M, Meyer F, Olsen GJ, Olson R, Osterman AL, Overbeek RA, McNeil LK, Paarmann D, Paczian T, Parrello B, Pusch GD, Reich C, Stevens R, Vassieva O, Vonstein V, Wilke A, Zagnitko O.** 2008. The RAST Server: rapid annotations using subsystems technology. *BMC genomics* **9**:75.
11. **Seemann T.** 2014. Prokka: rapid prokaryotic genome annotation. *Bioinformatics* **30**:2068-2069.
12. *Klebsiella aerogenes* MLST website, <https://pubmlst.org/kaerogenes/>, sited at the University of Oxford (**Jolley et al.** Wellcome Open Res 2018, 3:124 [version 1; referees: 2 approved]); MLST scheme developed by **Fengjun Sun** and colleagues at the Department of Pharmacy, Army Medical University, Chongqing, China. Database curated by **Qian Yuan**.
13. **Carattoli A, Zankari E, Garcia-Fernandez A, Voldby Larsen M, Lund O, Villa L, Moller Aarestrup F, Hasman H.** 2014. In silico detection and typing of plasmids using PlasmidFinder and plasmid multilocus sequence typing. *Antimicrob Agents Chemother* **58**:3895-3903.
14. **Zankari E, Hasman H, Cosentino S, Vestergaard M, Rasmussen S, Lund O, Aarestrup FM, Larsen MV.** 2012. Identification of acquired antimicrobial resistance genes. *J Antimicrob Chemother* **67**:2640-2644.
15. **Chen L, Zheng D, Liu B, Yang J, Jin Q.** 2016. VFDB 2016: hierarchical and refined dataset for big data analysis--10 years on. *Nucleic Acids Res* **44**:D694-697.
16. **Lam MMC, Wick RR, Wyres KL, Gorrie CL, Judd LM, Jenney AWJ, Brisse S, Holt KE.** 2018. Genetic diversity, mobilisation and spread of the yersiniabactin-encoding mobile element ICEKp in *Klebsiella pneumoniae* populations. *Microb Genom.*
17. **Lavigne JP, Sotto A, Nicolas-Chanoine MH, Bouziges N, Bourg G, Davin-Regli A, Pages JM.** 2012. Membrane permeability, a pivotal function involved in antibiotic resistance and virulence in *Enterobacter aerogenes* clinical isolates. *Clin Microbiol Infect* **18**:539-545.

18. **Treangen TJ, Ondov BD, Koren S, Phillippy AM.** 2014. The Harvest suite for rapid core-genome alignment and visualization of thousands of intraspecific microbial genomes. *Genome Biol* **15**:524.
